# Supplementary material for: Prognostic Value of the Albumin-to-γ-glutamyltransferase Ratio for Gallbladder Cancer Patients and Establishing a Nomogram for Overall Survival
Source: PubMed Central journal article supplement (PMC8176430; doi:10.7150/jca.49242), 2021-05-13
Supplement: jcav12p4172s1.pdf [file jcav12p4172s1.pdf]

1 **Supplementary Materials**

2

**Table S1. Baseline Characteristics**

| <b>Variates</b>               | <b>Entire cohort<br/>(n=140)</b> | <b>Training cohort<br/>(n=80)</b> | <b>Validation cohort<br/>(n=60)</b> | <b>P</b> |
|-------------------------------|----------------------------------|-----------------------------------|-------------------------------------|----------|
| <b>Sex</b>                    |                                  |                                   |                                     | 0.276    |
| Female                        | 82 (58.6%)                       | 50 (62.5%)                        | 32 (53.3%)                          |          |
| Male                          | 58 (41.4%)                       | 30 (37.5%)                        | 28 (46.7%)                          |          |
| <b>Age</b>                    |                                  |                                   |                                     | 0.200    |
| ≤65                           | 80 (57.1%)                       | 42 (52.5%)                        | 38 (63.3%)                          |          |
| >65                           | 60 (42.9%)                       | 38 (47.5%)                        | 22 (36.7%)                          |          |
| <b>BMI (kg/m<sup>2</sup>)</b> |                                  |                                   |                                     | 0.590    |
| ≤24                           | 76 (54.3%)                       | 45 (56.2%)                        | 31 (51.7%)                          |          |
| >24                           | 64 (45.7%)                       | 35 (43.8%)                        | 29 (48.3%)                          |          |
| <b>Tumor size (cm)</b>        |                                  |                                   |                                     | 0.155    |
| ≤3                            | 81 (57.9%)                       | 59 (54.6%)                        | 22 (68.8%)                          |          |
| >3                            | 59 (42.1%)                       | 49 (45.4%)                        | 10 (31.3%)                          |          |
| <b>Tumor number</b>           |                                  |                                   |                                     | 0.393    |
| Single                        | 112 (80.0%)                      | 62 (77.5%)                        | 50 (83.3%)                          |          |
| Multiple                      | 28 (20.0%)                       | 18 (22.5%)                        | 10 (16.7%)                          |          |
| <b>Tumor differentiation</b>  |                                  |                                   |                                     | 0.231    |
| Poor                          | 55 (39.3%)                       | 28 (35.0%)                        | 27 (45.0%)                          |          |
| Moderate-well                 | 85 (60.7%)                       | 52 (65.0%)                        | 33 (55.0%)                          |          |
| <b>TNM stage</b>              |                                  |                                   |                                     | 0.529    |
| 0                             | 4 (2.9%)                         | 2 (2.5%)                          | 2 (3.3%)                            |          |
| I                             | 13 (9.3%)                        | 10 (12.5%)                        | 3 (5.0%)                            |          |
| II                            | 12 (8.6%)                        | 6 (7.5%)                          | 6 (10.0%)                           |          |
| IIIA                          | 45 (32.1%)                       | 26 (32.5%)                        | 19 (31.7%)                          |          |
| IIIB                          | 45 (32.1%)                       | 24 (30.0%)                        | 21 (35.0%)                          |          |
| IV                            | 21 (15.0%)                       | 12 (15.0%)                        | 9 (15.0%)                           |          |
| <b>T stage</b>                |                                  |                                   |                                     | 0.615    |
| Tis                           | 4 (2.9%)                         | 2 (2.5%)                          | 2 (3.3%)                            |          |
| T1                            | 12 (8.6%)                        | 10 (12.5%)                        | 2 (3.3%)                            |          |
| T2                            | 20 (14.3%)                       | 9 (11.3%)                         | 11 (18.3%)                          |          |
| T3                            | 96 (68.6%)                       | 55 (68.8%)                        | 41 (68.3%)                          |          |
| T4                            | 8 (5.7%)                         | 4 (5.0%)                          | 4 (6.7%)                            |          |
| <b>N stage</b>                |                                  |                                   |                                     | 0.336    |
| N0                            | 80 (57.1%)                       | 48 (60.0%)                        | 32 (53.3%)                          |          |
| N1                            | 50 (35.7%)                       | 28 (35.0%)                        | 22 (36.7%)                          |          |
| N2                            | 10 (7.1%)                        | 4 (5.0%)                          | 6 (10.0%)                           |          |
| <b>M stage</b>                |                                  |                                   |                                     | 0.745    |
| M0                            | 130 (92.9%)                      | 75 (93.8%)                        | 55 (91.7%)                          |          |
| M1                            | 10 (7.1%)                        | 5 (6.3%)                          | 5 (8.3%)                            |          |
| <b>R0 resection</b>           |                                  |                                   |                                     | 0.130    |
| No                            | 52 (37.1%)                       | 34 (42.5%)                        | 18 (30.0%)                          |          |
| Yes                           | 88 (62.9%)                       | 46 (57.5%)                        | 42 (70.0%)                          |          |
| <b>Adjuvant therapy</b>       |                                  |                                   |                                     | 0.486    |
| No                            | 108 (77.1%)                      | 60 (75.0%)                        | 48 (80.0%)                          |          |
| Yes                           | 32 (22.9%)                       | 20 (25.0%)                        | 12 (20.0%)                          |          |
| <b>Jaundice</b>               |                                  |                                   |                                     | 0.841    |
| No                            | 118 (84.29%)                     | 67 (83.8%)                        | 51 (85.0%)                          |          |
| Yes                           | 22 (15.71%)                      | 13 (16.2%)                        | 9 (15.0%)                           |          |
| <b>Gallstone</b>              |                                  |                                   |                                     | 0.007*   |
| No                            | 75 (53.57%)                      | 35 (43.8%)                        | 40 (66.7%)                          |          |
| Yes                           | 65 (46.43%)                      | 45 (56.2%)                        | 20 (33.3%)                          |          |
| <b>Diabetes</b>               |                                  |                                   |                                     | 0.634    |

|                                  |              |             |              |        |
|----------------------------------|--------------|-------------|--------------|--------|
| No                               | 110 (78.57%) | 64 (80.0%)  | 46 (76.7%)   |        |
| Yes                              | 30 (21.43%)  | 16 (20.0%)  | 14 (23.3%)   |        |
| <b>Hypertension</b>              |              |             |              | 0.001* |
| No                               | 98 (70.0%)   | 47 (58.8%)  | 51 (85.0%)   |        |
| Yes                              | 42 (30.0%)   | 33 (41.3%)  | 9 (15.0%)    |        |
| <b>CA19-9 (U/mL)</b>             |              |             |              | 0.883  |
| ≤40                              | 62 (44.3%)   | 35 (43.8%)  | 27 (45.0%)   |        |
| >40                              | 78 (55.7%)   | 45 (56.2%)  | 33 (55.0%)   |        |
| <b>ALB (g/L)</b>                 |              |             |              | 0.486  |
| ≤35                              | 20 (14.3%)   | 10 (12.5%)  | 10 (16.7%)   |        |
| >35                              | 120 (85.7%)  | 70 (87.5%)  | 50 (83.3%)   |        |
| <b>GGT (U/L)</b>                 |              |             |              | 0.495  |
| ≤40                              | 70 (50.00%)  | 42 (52.5%)  | 28 (46.7%)   |        |
| >40                              | 70 (50.00%)  | 38 (47.5%)  | 32 (53.3%)   |        |
| <b>AGR</b>                       |              |             |              | 0.771  |
| ≤2.050                           | 108 (77.1%)  | 61 (76.3%)  | 47 (78.3%)   |        |
| >2.050                           | 32 (22.9%)   | 19 (23.8%)  | 13 (21.7%)   |        |
| <b>NLR</b>                       |              |             |              | 0.514  |
| ≤1.734                           | 39 (27.9%)   | 24 (30.0%)  | 15 (25.0%)   |        |
| >1.734                           | 101 (72.1%)  | 56 (70.0%)  | 45 (75.0%)   |        |
| <b>MLR</b>                       |              |             |              | 0.170  |
| ≤0.211                           | 63 (45.0%)   | 40 (50.0%)  | 23 (38.3%)   |        |
| >0.211                           | 77 (55.0%)   | 40 (50.0%)  | 37 (61.7%)   |        |
| <b>PLR</b>                       |              |             |              | 0.801  |
| ≤159.0                           | 88 (62.9%)   | 51 (63.7%)  | 37 (61.7%)   |        |
| >159.0                           | 52 (37.1%)   | 29 (36.3%)  | 23 (38.3%)   |        |
| <b>FAR</b>                       |              |             |              | 0.261  |
| ≤0.084                           | 66 (47.1%)   | 41 (51.2%)  | 25 (41.7%)   |        |
| >0.084                           | 74 (52.9%)   | 39 (48.8%)  | 35 (58.3%)   |        |
| <b>Hospital stay (day)</b>       | 15 (3–70)    | 15 (3–68)   | 15 (5–70)    | 0.239  |
| <b>Bleeding volume (mL)</b>      | 200 (0–1500) | 200 (0–800) | 200 (0–1500) | 0.485  |
| <b>Postsurgical complication</b> |              |             |              | 0.481  |
| No                               | 109 (77.9%)  | 64 (80.0%)  | 45 (75.0%)   |        |
| Yes                              | 31 (22.1%)   | 16 (20.0%)  | 15 (25.0%)   |        |

1 Notes: Asterisks indicate statistically significant differences between the training cohort and the  
2 validation cohort ( $P<0.05$ ).

3 Abbreviations: AGR, albumin-to- $\gamma$ -glutamyltransferase ratio; ALB, albumin; BMI, body mass  
4 index; CA19-9, carbohydrate antigen 19-9; FAR: fibrinogen-to-albumin ratio; GGT,  $\gamma$ -  
5 glutamyltransferase; MLR: monocyte-to-lymphocyte ratio; NLR: neutrophil-to-lymphocyte ratio;  
6 PLR: platelet-to-lymphocyte ratio.

7

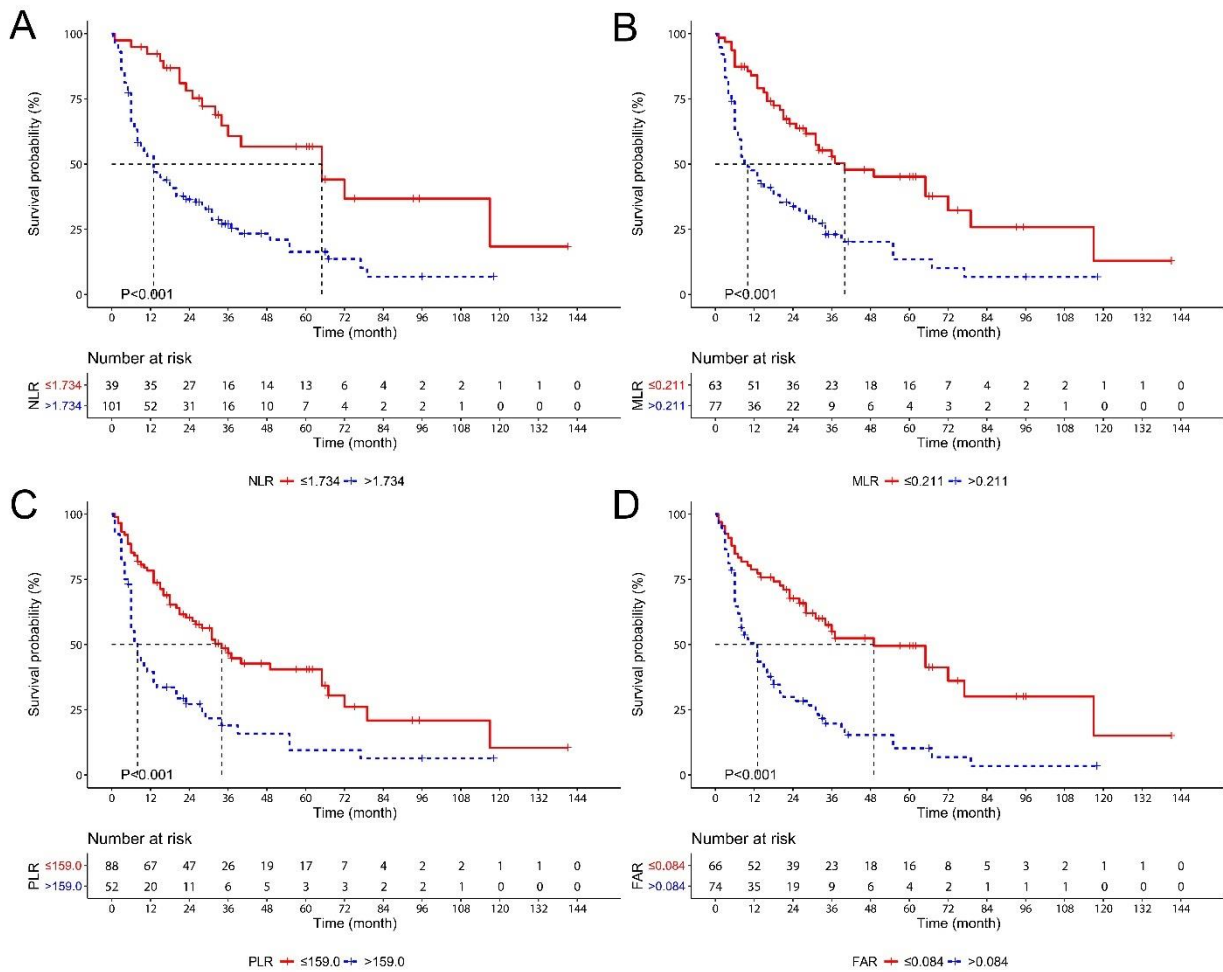

1  
2 **Figure S1.** Kaplan-Meier survival curves for overall survival in gallbladder cancer patients  
3 stratified according to NLR (A), MLR (B), PLR (C) and FAR (D).  
4 Abbreviations: FAR, fibrinogen-to-albumin ratio; MLR, monocyte-to-lymphocyte ratio; NLR,  
5 neutrophil-to-lymphocyte ratio; PLR, platelet-to-lymphocyte ratio.

6

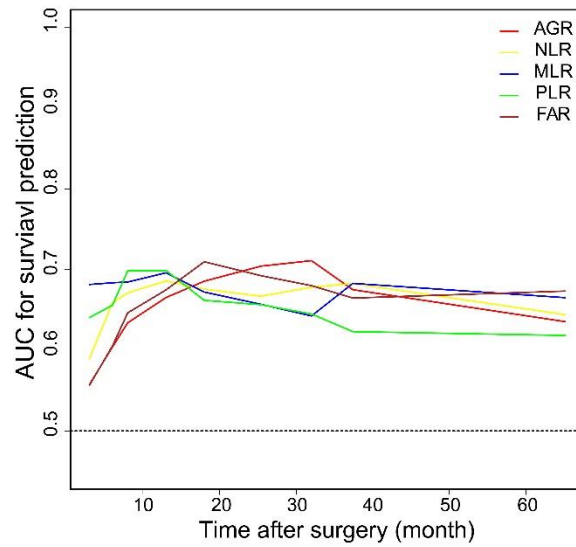

1  
 2 **Figure S2.** Time-dependent area under ROC curves of AGR and other inflammation-related indices  
 3 for overall survival prediction.

4 Abbreviations: AGR, albumin-to- $\gamma$ -glutamyltransferase ratio; FAR, fibrinogen-to-albumin ratio;  
 5 MLR, monocyte-to-lymphocyte ratio; NLR, neutrophil-to-lymphocyte ratio; PLR, platelet-to-  
 6 lymphocyte ratio.

7

8

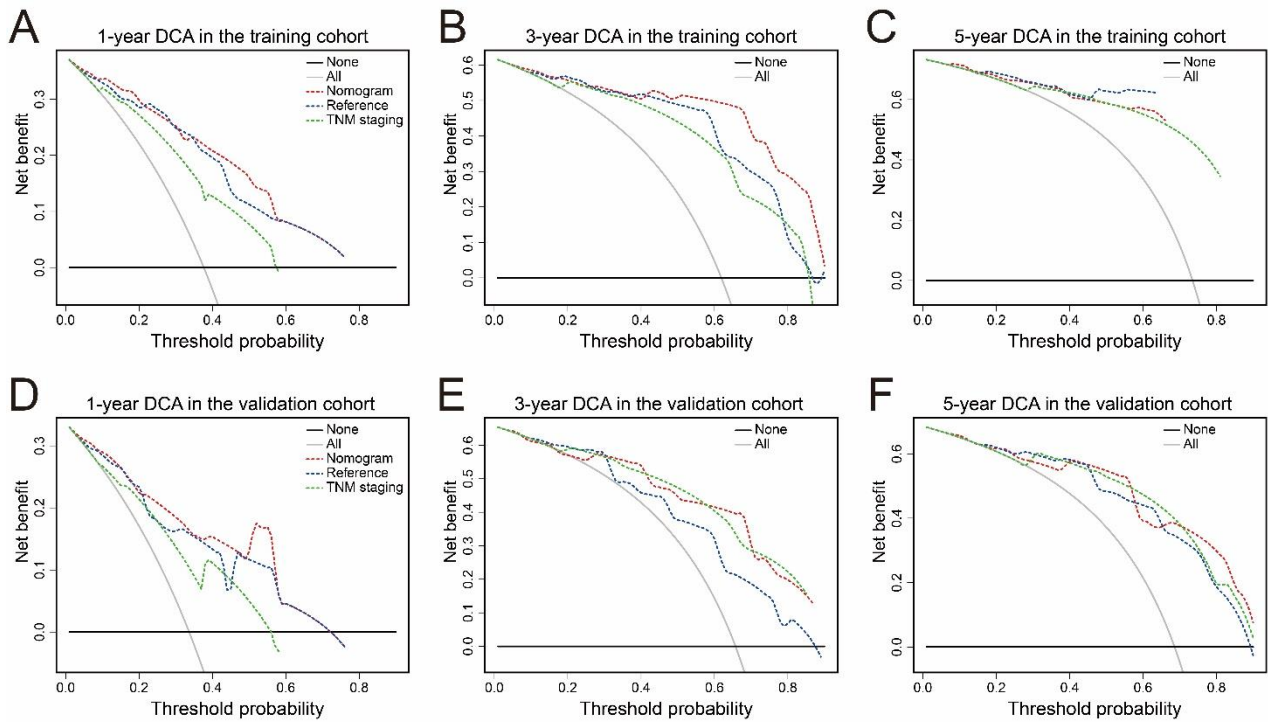

1  
 2 **Figure S3.** Decisive curve analyses of the nomogram (red), the reference model (blue) and the TNM  
 3 staging system (green) for 1-, 3- and 5-year overall survival in the training cohort (A-C) and the  
 4 validation cohort (D-F). The horizontal black line represents all patients are negative and the net  
 5 benefit is 0; the grey line represents all patients are positive. The time was marked on the top of each  
 6 panel.

7

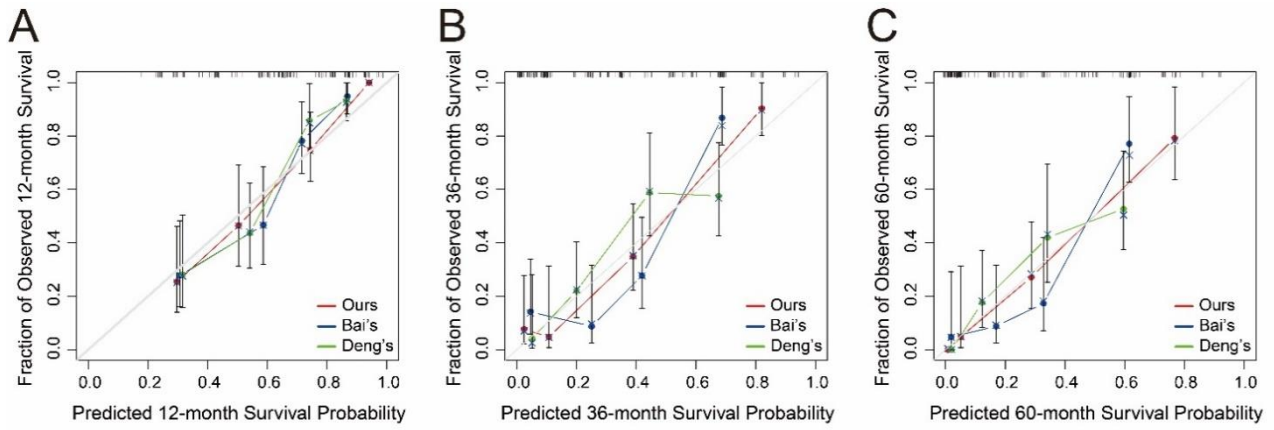

1

2 **Figure S4.** Calibration curves of our (red), Bai's (blue) and Deng's (green) nomograms for 1-, 3-  
 3 and 5-year overall survival. The x-axis represents nomogram predicted probability of survival, and  
 4 the y-axis is the actually observed survival probability.

5

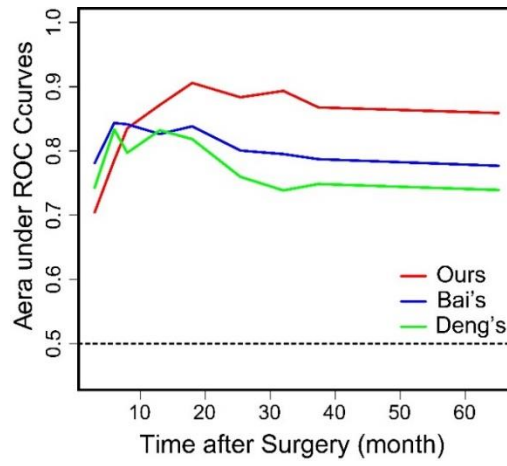

1  
2 **Figure S5.** Time-dependent area under ROC curves of our (red), Bai's (blue) and Deng's (green)  
3 nomograms.  
4

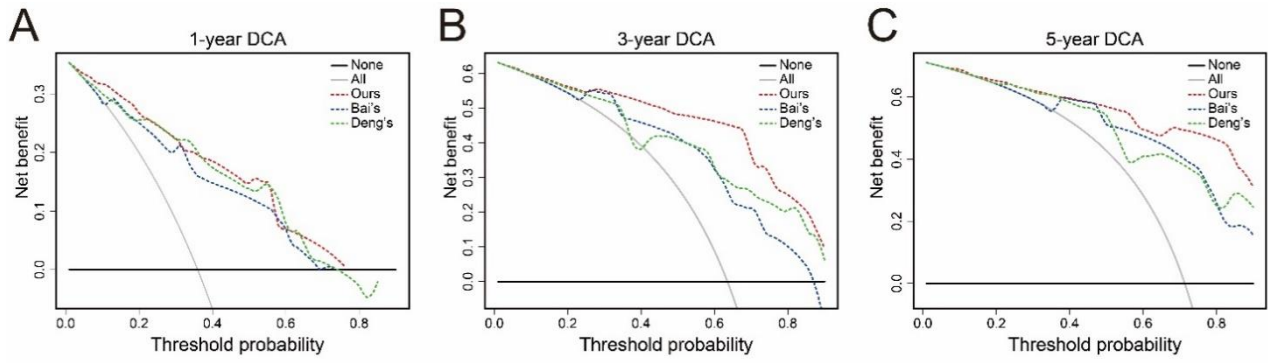

1

2 **Figure S6.** Decisive curve analysis plots of our (red), Bai's (blue) and Deng's (green) nomograms for  
 3 1-, 3- and 5-year overall survival. The horizontal black line represents all patients are negative and  
 4 the net benefit is 0; the grey line represents all patients are positive. The time was marked on the top  
 5 of each panel.

6



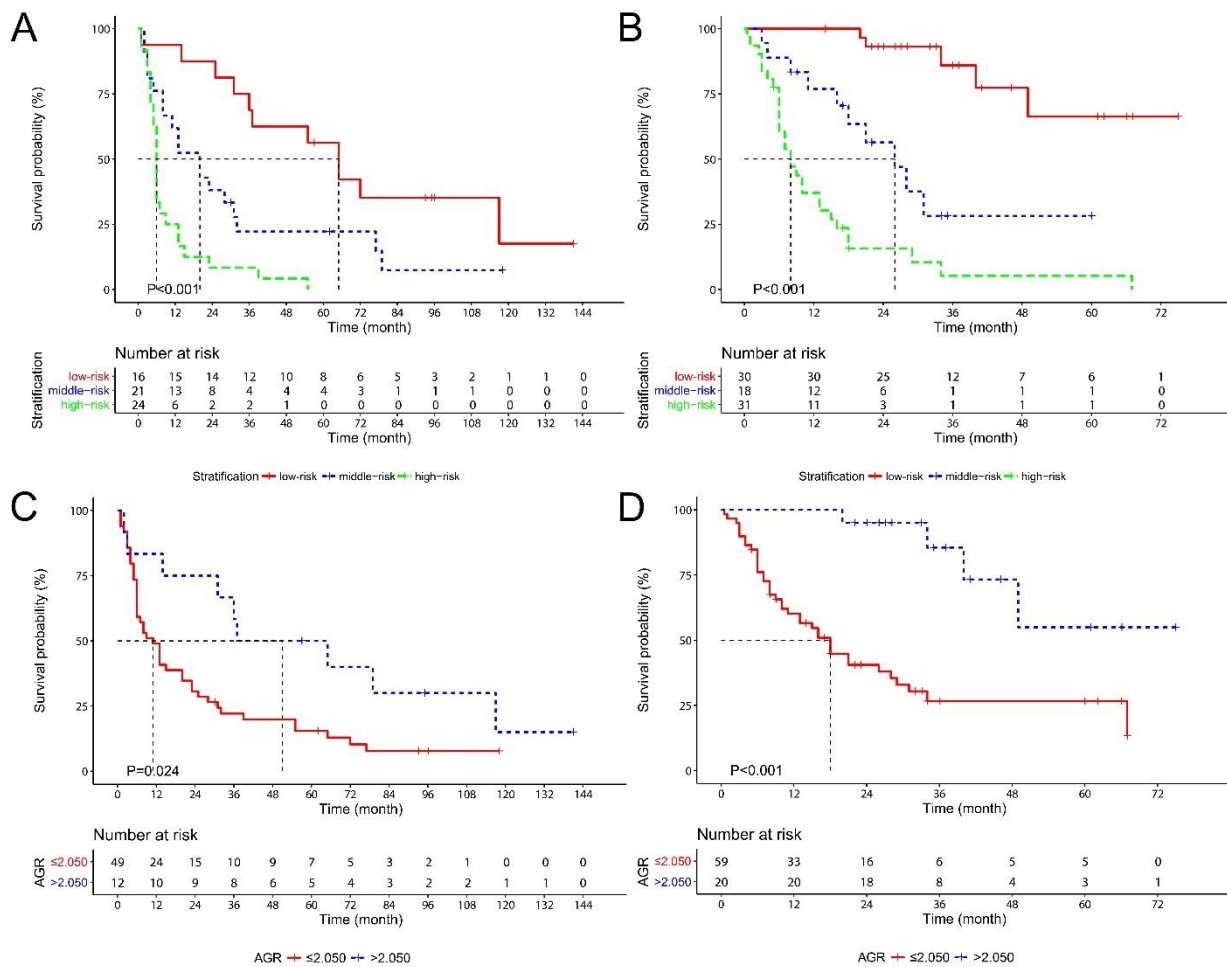

1  
 2 **Figure S7.** Kaplan-Meier survival curves for overall survival according to the risk stratification  
 3 model (A-B) and AGR (C-D) in the 2003-2012 and 2013-2017 subgroups. A: survival curves of the  
 4 risk stratification model in the 2003-2012 subgroup; B: survival curves of the risk stratification  
 5 model in the 2013-2017 subgroup; C: survival curves of different levels of AGR in the 2003-2012  
 6 subgroup; D: survival curves of different levels of AGR in the 2013-2017 subgroup.  
 7 Abbreviations: AGR, albumin-to- $\gamma$ -glutamyltransferase ratio.

8  
 9

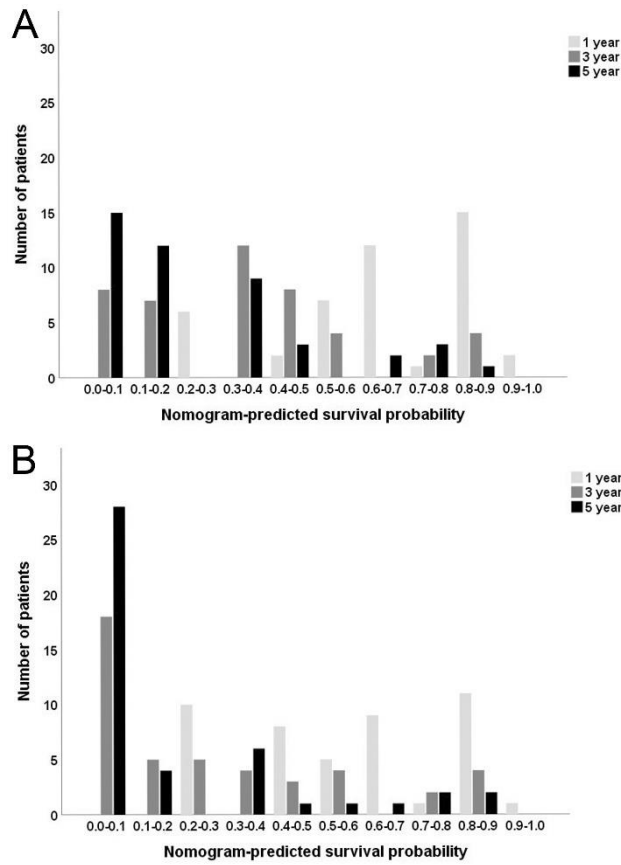

1  
2 **Figure S8.** Survival probability predicted by nomogram in patients with TNM stage IIIA (A) & IIIB  
3 (B). The x-axis represents the nomogram-predicted survival probability at 1, 3 and 5 years after  
4 surgery, and the y-axis is the number of patients within the corresponding interval of nomogram-  
5 predicted survival probability.

6
